# Supplementary material for: Electronic modulation of cobalt phosphide by lanthanum doping for efficient overall water splitting in alkaline media
Source: Royal Society of Chemistry journal article supplement (doi:10.1039/d2ce00599a), 2022-01-01
Supplement: d2ce00599a1.pdf [file d2ce00599a1.pdf]

Electronic Supplementary Information

## Electronic Modulation of Cobalt Phosphide by Lanthanum Doping for Efficient Overall Water Splitting in Alkaline Media

*Daekyu Kim,<sup>a</sup> Yuan Yuan,<sup>a</sup> and Lawrence Yoon Suk Lee<sup>a,b,\*</sup>*

<sup>a</sup> Department of Applied Biology and Chemical Technology, The Hong Kong Polytechnic University, Hung Hom, Kowloon, Hong Kong SAR

<sup>b</sup> Research Institute for Smart Energy, The Hong Kong Polytechnic University, Hung Hom, Kowloon, Hong Kong SAR

\* **Corresponding Author:** lawrence.y.s.lee@polyu.edu.hk (L. Y. S. Lee)

## Figures

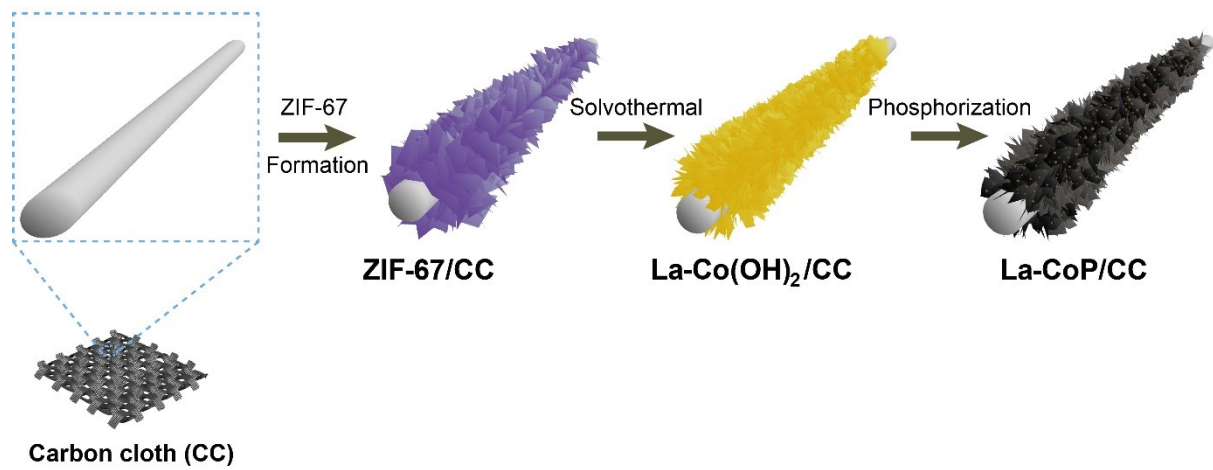

**Scheme 1.** Schematic illustration of the fabrication process of La-CoP on carbon cloth (CC).

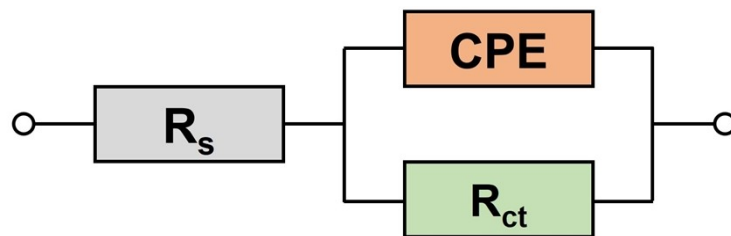

**Fig. S1.** Equivalent circuit used for EIS data analysis.

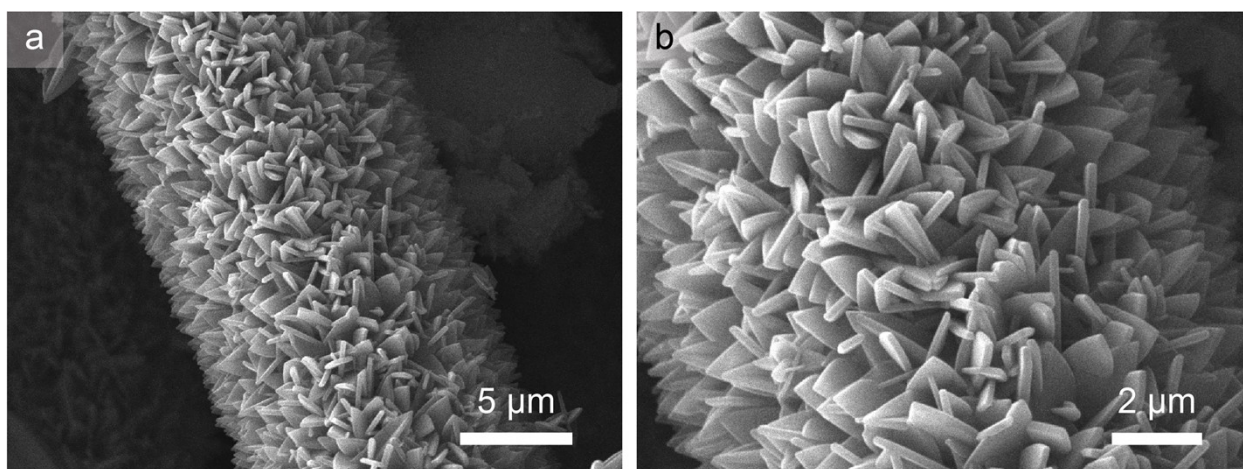

**Fig. S2.** (a, b) SEM of ZIF-67 on carbon cloth.

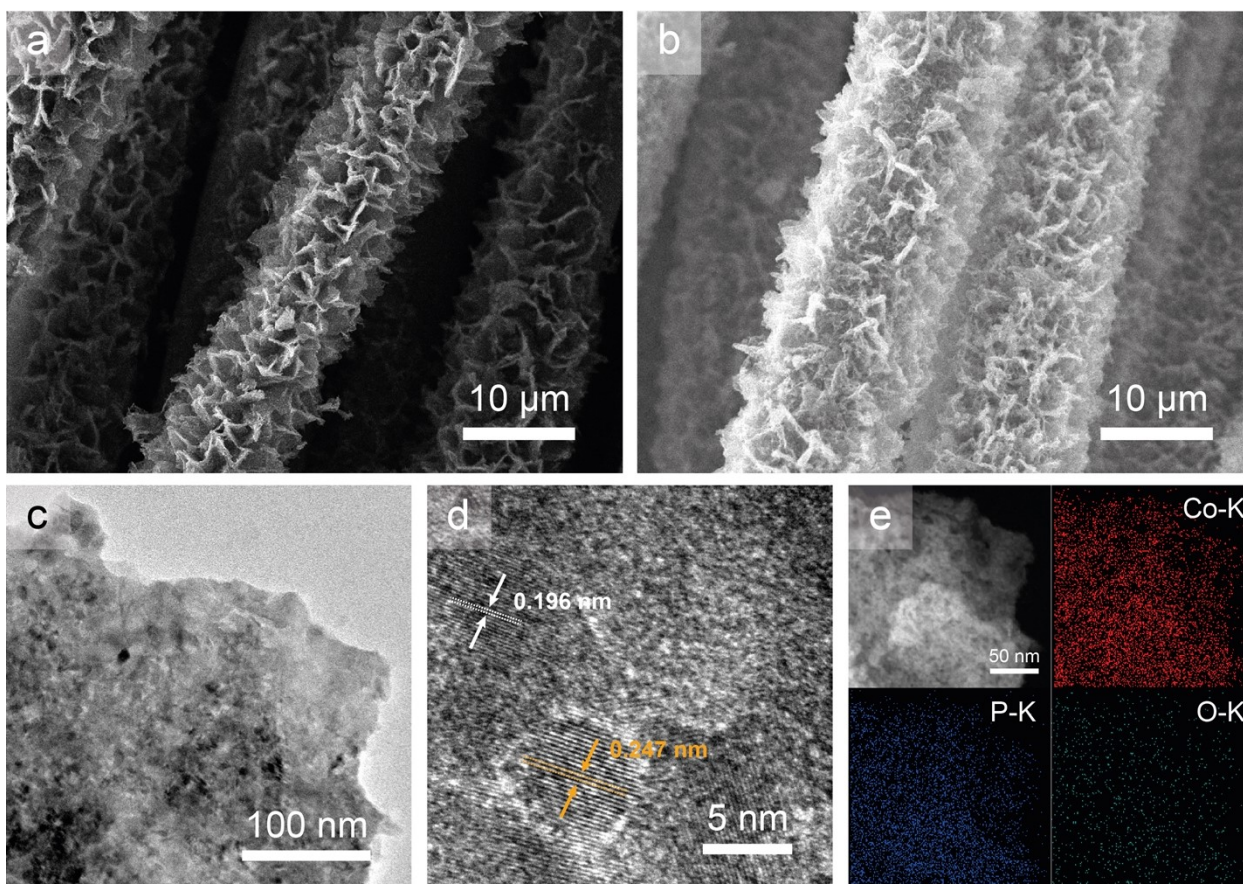

**Fig. S3.** SEM images of (a)  $\text{Co(OH)}_2$  and (b)  $\text{CoP}$  on carbon cloth. (c) TEM and (d) HRTEM images of  $\text{CoP}$ . (e) The corresponding EDX mapping images of  $\text{CoP}$  showing Co, P, and O elements.

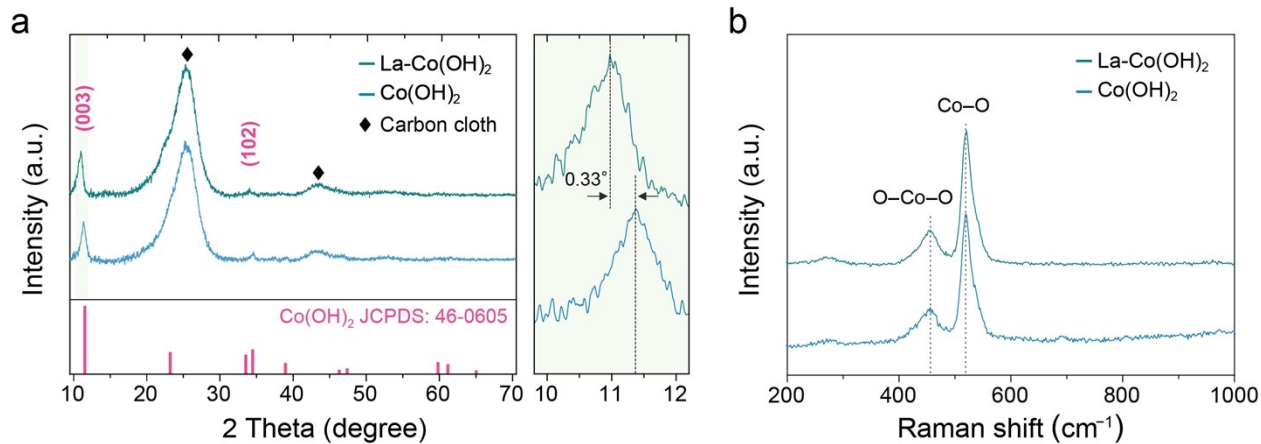

**Fig. S4.** (a) XRD patterns and (b) Raman spectra of Co(OH)<sub>2</sub> and La-Co(OH)<sub>2</sub> on carbon cloth. The right panel in (a) is the enlarged region between 10 and 12°.

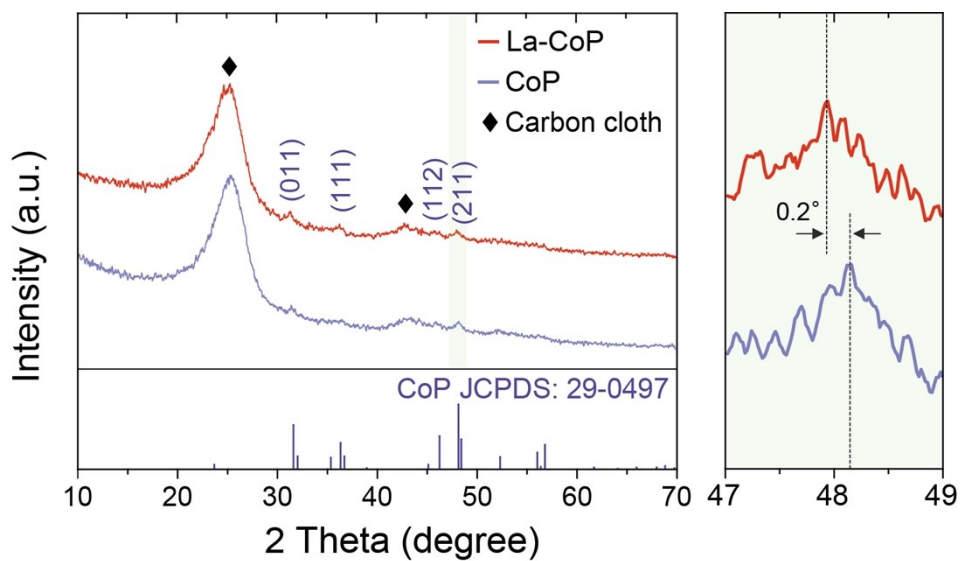

**Fig. S5.** XRD patterns of CoP and La-CoP on carbon cloth. The right panel is the enlarged region between 47 and 49°.

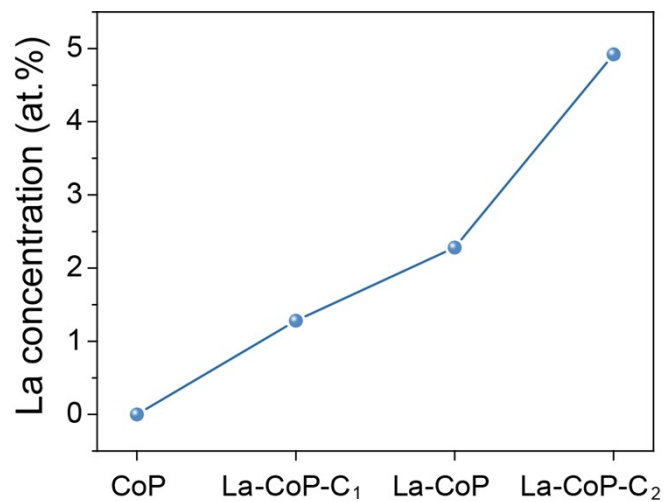

**Fig S6.** La-doping levels in a series of La-doped CoP.

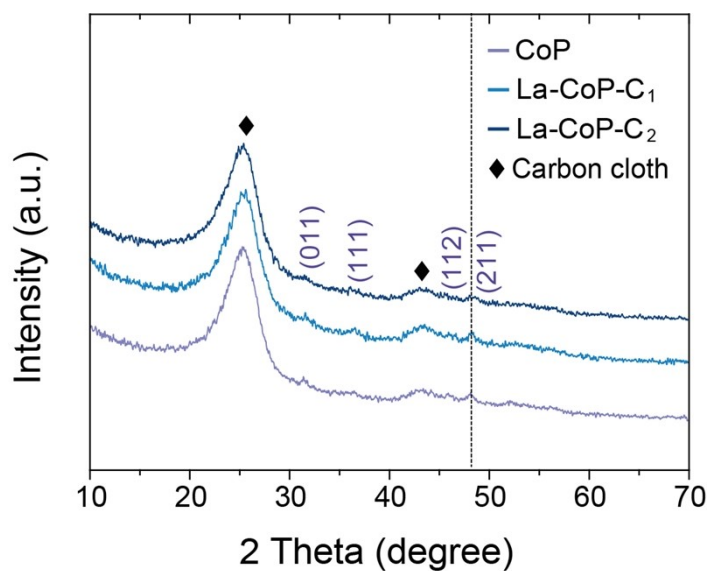

**Fig. S7.** XRD patterns of CoP, La-CoP-C<sub>1</sub>, and La-CoP-C<sub>2</sub> on carbon cloth.

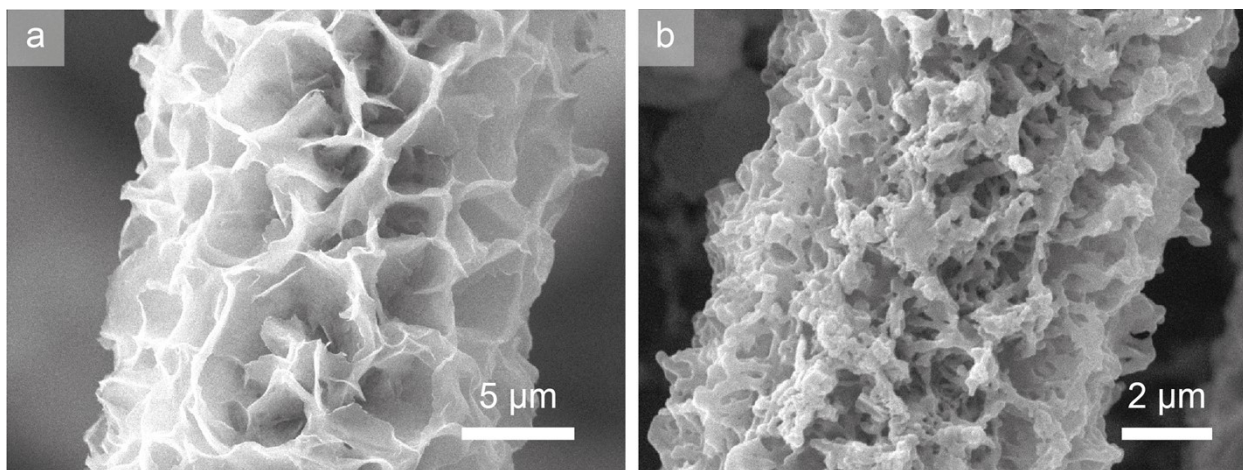

**Fig. S8.** SEM images of (a) La-CoP-C<sub>1</sub> and (b) La-CoP-C<sub>2</sub>.

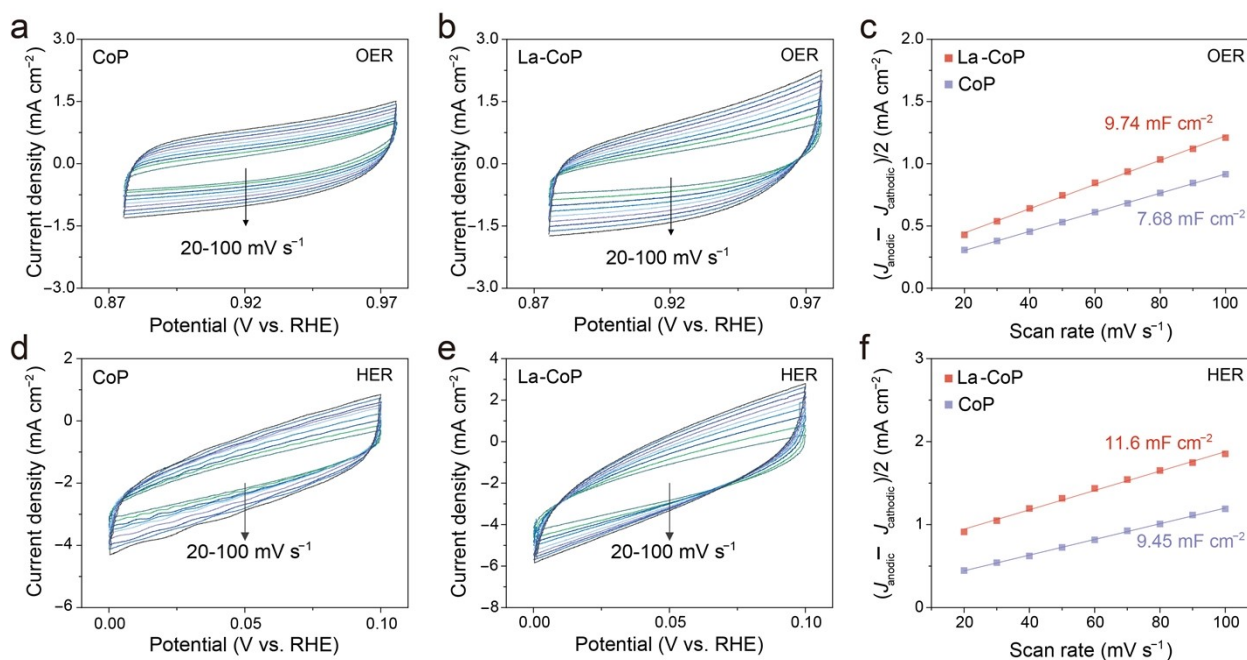

**Fig. S9.** CV curves of (a, d) CoP and (b, e) La-CoP obtained at various scan rates. C<sub>dl</sub> measurements of CoP and La-CoP under (c) OER and (f) HER conditions.

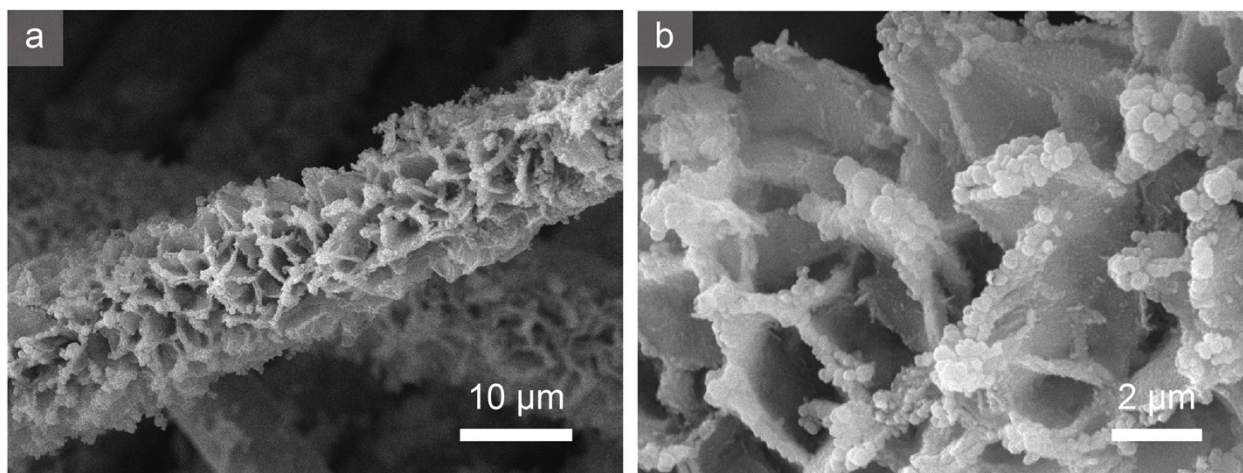

**Fig. S10.** (a, b) SEM images of La-CoP on carbon cloth after OER test.

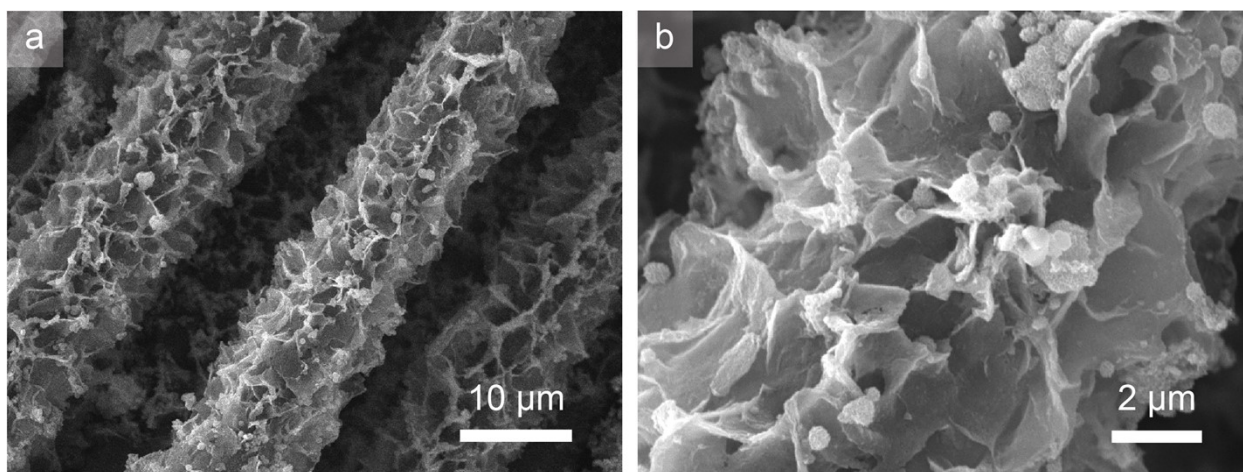

**Fig. S11.** (a, b) SEM images of La-CoP on carbon cloth after HER test.

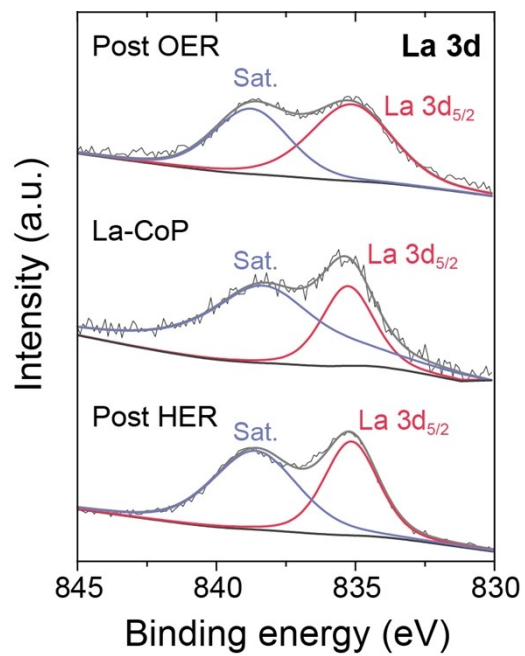

**Fig. S12.** High-resolution XPS spectra of La-CoP in La 3d region after OER (top) and HER (bottom).



**Table S1.** ICP-OES analysis results of CoP and La-doped CoP samples.

| <b>Samples</b>        | <b>Atomic ratio</b> |          |           |
|-----------------------|---------------------|----------|-----------|
|                       | <b>Co</b>           | <b>P</b> | <b>La</b> |
| CoP                   | 1                   | 1.26     | -         |
| La-CoP                | 1                   | 1.44     | 0.06      |
| La-CoP-C <sub>1</sub> | 1                   | 1.43     | 0.03      |
| La-CoP-C <sub>2</sub> | 1                   | 1.48     | 0.13      |

**Table S2.** Summary of loading masses of the as-prepared catalysts on carbon cloth.

| <b>Sample</b>         | <b>Loading mass (mg cm<sup>-2</sup>)</b> |
|-----------------------|------------------------------------------|
| CoP                   | 4.21                                     |
| La-CoP-C <sub>1</sub> | 4.48                                     |
| La-CoP                | 4.88                                     |
| La-CoP-C <sub>2</sub> | 5.27                                     |

**Table S3.** Comparison of OER performances of La-CoP with recently reported electrocatalysts in alkaline solution.

| Catalyst                                 | Support          | Overpotential (mV)<br>at 10 mA cm <sup>-2</sup> | Tafel slope<br>(mV dec <sup>-1</sup> ) | Ref.             |
|------------------------------------------|------------------|-------------------------------------------------|----------------------------------------|------------------|
| P@pCoPc-1/Co <sub>3</sub> O <sub>4</sub> | CC <sup>a</sup>  | 320                                             | 57.4                                   | 1                |
| Co-LDH@ZIF-67                            | CC               | 187                                             | 59                                     | 2                |
| Co-P@IC/(Co-Fe)P                         | CC               | 174                                             | 18                                     | 3                |
| Cr-CoP                                   | CP <sup>b</sup>  | 251                                             | 47                                     | 4                |
| 20% Rh-doped CoFe-ZLDH                   | NF <sup>c</sup>  | 245 <sup>e</sup>                                | 42.8                                   | 5                |
| CoP-InNC@CNT                             | CC               | 270                                             | 84                                     | 6                |
| Er-doped CoP                             | CC               | 256                                             | 70                                     | 7                |
| Co@N-CS/N-HCP                            | CC               | 248                                             | 68                                     | 8                |
| NDCHN                                    | GCE <sup>d</sup> | 270                                             | 63.9                                   | 9                |
| Ni-Co-P HNBS                             | NF               | 270                                             | 76                                     | 10               |
| CoP/NCNHP                                | GCE              | 310                                             | 70                                     | 11               |
| CoPO                                     | GCE              | 280                                             | 59                                     | 12               |
| Mo-CoOOH                                 | CC               | 305                                             | 56                                     | 13               |
| NiCoP@Cu <sub>3</sub> P                  | CF               | 309                                             | 42                                     | 14               |
| Co/CoP                                   | GCE              | 340                                             | 79.5                                   | 15               |
| NiCoP/C                                  | GCE              | 330                                             | 96                                     | 16               |
| CoTe <sub>2</sub> @NCNTFs                | NF               | 330                                             | 83                                     | 17               |
| Co/β-Mo <sub>2</sub> C@N-CNTs            | GCE              | 356                                             | 67                                     | 18               |
| CoV-UAH                                  | NF               | 250                                             | 44                                     | 19               |
| P/MoCo <sub>3</sub> O <sub>4</sub>       | CC               | 265                                             | 59.4                                   | 20               |
| <b>La-CoP</b>                            | <b>CC</b>        | <b>270</b>                                      | <b>67.4</b>                            | <b>This work</b> |

<sup>a</sup> CC: carbon cloth, <sup>b</sup> CP: carbon paper, <sup>c</sup> NF: nickel foam, <sup>d</sup> GCE: glassy carbon electrode, and <sup>e</sup> Measured at 100 mA cm<sup>-2</sup>.

**Table S4.** Summary of EIS parameters of the catalysts obtained during the OER process.

| <b>Sample</b>         | <b><math>R_s</math> (<math>\Omega</math>)</b> | <b>CPE</b> | <b><math>R_{ct}</math> (<math>\Omega</math>)</b> |
|-----------------------|-----------------------------------------------|------------|--------------------------------------------------|
| CoP                   | 4.754                                         | 0.0909     | 12.9                                             |
| La-CoP-C <sub>1</sub> | 3.928                                         | 0.0730     | 8.74                                             |
| La-CoP                | 3.253                                         | 0.227      | 3.95                                             |
| La-CoP-C <sub>2</sub> | 3.399                                         | 0.144      | 5.02                                             |
| RuO <sub>2</sub>      | 4.097                                         | 0.0033     | 12.8                                             |

**Table S5.** Comparison of HER performances of La-CoP with recently reported electrocatalysts in alkaline solution.

| Catalyst                                 | Support          | Overpotential (mV)<br>at 10 mA cm <sup>-2</sup> | Tafel slope<br>(mV dec <sup>-1</sup> ) | Ref.             |
|------------------------------------------|------------------|-------------------------------------------------|----------------------------------------|------------------|
| P@pCoPc-1/Co <sub>3</sub> O <sub>4</sub> | CC <sup>a</sup>  | 120                                             | 98.4                                   | 1                |
| Co-P@IC/(Co-Fe)P                         | CC               | 53                                              | 88                                     | 3                |
| Cr-CoP                                   | CP <sup>b</sup>  | 67                                              | 31                                     | 4                |
| 20% Rh-doped CoFe-ZLDH                   | NF <sup>c</sup>  | 28                                              | 42.8                                   | 5                |
| CoP-InNC@CNT                             | CC               | 159                                             | 56                                     | 6                |
| Er-doped CoP                             | CC               | 66                                              | 61                                     | 7                |
| Co@N-CS/N-HCP                            | CC               | 66                                              | 65                                     | 8                |
| NDCHN                                    | GP <sup>d</sup>  | 201                                             | 133.2                                  | 9                |
| Ni-Co-P HNBS                             | NF               | 107                                             | 46                                     | 10               |
| CoP/NCNHP                                | GCE <sup>e</sup> | 115                                             | 66                                     | 11               |
| CoPO                                     | GCE              | 158                                             | 101                                    | 12               |
| Mo-CoP                                   | CC               | 40                                              | 65                                     | 13               |
| NiCoP@Cu <sub>3</sub> P                  | CF               | 54                                              | 72                                     | 14               |
| Co/CoP                                   | GCE              | 253                                             | 73.8                                   | 15               |
| CoTe <sub>2</sub> @NCNTFs                | NF               | 208                                             | 58                                     | 17               |
| Co/β-Mo <sub>2</sub> C@N-CNTs            | GCE              | 170                                             | 92                                     | 18               |
| Cr-doped FeNi-P/NCN                      | NF               | 190                                             | 68.51                                  | 21               |
| CoNiP-0.25                               | GCE              | 145.8                                           | 52                                     | 22               |
| FeCo                                     | GCE              | 149                                             | 77                                     | 23               |
| <b>La-CoP</b>                            | <b>CC</b>        | <b>109</b>                                      | <b>64.3</b>                            | <b>This work</b> |

<sup>a</sup> CC: carbon cloth, <sup>b</sup> CP: carbon paper, <sup>c</sup> NF: nickel foam, <sup>d</sup> GP: graphite paper, <sup>e</sup> GCE: glassy carbon electrode.

**Table S6.** Summary of EIS parameters of the catalysts obtained during the HER process.

| <b>Sample</b>         | <b><math>R_s</math> (<math>\Omega</math>)</b> | <b>CPE</b> | <b><math>R_{ct}</math> (<math>\Omega</math>)</b> |
|-----------------------|-----------------------------------------------|------------|--------------------------------------------------|
| CoP                   | 3.96                                          | 0.0048     | 22.3                                             |
| La-CoP-C <sub>1</sub> | 3.231                                         | 0.0068     | 11.8                                             |
| La-CoP                | 4.002                                         | 0.0079     | 4.04                                             |
| La-CoP-C <sub>2</sub> | 3.276                                         | 0.0089     | 6.04                                             |
| Pt/C                  | 3.678                                         | 0.0005     | 2.28                                             |

**Table S7.** Comparison of cell potentials at 10 mA cm<sup>-2</sup> of La-CoP and recently reported analogous catalysts for overall water splitting catalysis.

| Catalyst                                 | Support          | Overpotential (V) | Ref.             |
|------------------------------------------|------------------|-------------------|------------------|
| P@pCoPc-1/Co <sub>3</sub> O <sub>4</sub> | CC <sup>a</sup>  | 1.672             | 1                |
| Co-P@IC/(Co-Fe)P                         | CC               | 1.46              | 3                |
| Cr-CoP                                   | CP <sup>b</sup>  | 1.59              | 4                |
| 20% Rh-doped CoFe-ZLDH                   | NF <sup>c</sup>  | 1.46              | 5                |
| CoP-InNC@CNT                             | CC               | 1.58              | 6                |
| Er-doped CoP                             | CC               | 1.58              | 7                |
| Co@N-CS/N-HCP                            | CC               | 1.545             | 8                |
| NDCHN                                    | GP <sup>d</sup>  | 1.701             | 9                |
| Ni-Co-P HNBS                             | NF               | 1.62              | 10               |
| CoP/NCNHP                                | GCE <sup>e</sup> | 1.64              | 11               |
| CoPO                                     | GCE              | 1.67              | 12               |
| CoTe <sub>2</sub> @NCNTFs                | NF               | 1.67              | 17               |
| Co/β-Mo <sub>2</sub> C@N-CNTs            | GCE              | 1.64              | 18               |
| <b>La-CoP</b>                            | <b>CC</b>        | <b>1.068</b>      | <b>This work</b> |

<sup>a</sup> CC: carbon cloth, <sup>b</sup> CP: carbon paper, <sup>c</sup> NF: nickel foam, <sup>d</sup> GP: graphite paper, <sup>e</sup> GCE: glassy carbon electrode. All electrochemical tests were conducted in 1.0 M KOH

## References

1. Y. Kim, D. Kim, J. Lee, L. Y. S. Lee and D. K. P. Ng, *Adv. Funct. Mater.*, 2021, **31**, 2103290.
2. Z. Li, X. Zhang, Y. Kang, C. C. Yu, Y. Wen, M. Hu, D. Meng, W. Song and Y. Yang, *Adv. Sci.*, 2021, **8**, 2002631.
3. Y. Zhu, L. Zhang, X. Zhang, Z. Li, M. Zha, M. Li and G. Hu, *Chemical Engineering Journal*, 2021, **405**, 127002.
4. W. Li, Y. Jiang, Y. Li, Q. Gao, W. Shen, Y. Jiang, R. He and M. Li, *Chem. Eng. J.*, 2021, **425**, 130651.
5. K. Zhu, J. Chen, W. Wang, J. Liao, J. Dong, M. O. L. Chee, N. Wang, P. Dong, P. M. Ajayan, S. Gao, J. Shen and M. Ye, *Advanced Functional Materials*, 2020, **30**, 2003556.
6. L. Chai, Z. Hu, X. Wang, Y. Xu, L. Zhang, T.-T. Li, Y. Hu, J. Qian and S. Huang, *Advanced Science*, 2020, **7**, 1903195.
7. G. Zhang, B. Wang, J. Bi, D. Fang and S. Yang, *Journal of Materials Chemistry A*, 2019, **7**, 5769-5778.
8. Z. Chen, Y. Ha, H. Jia, X. Yan, M. Chen, M. Liu and R. Wu, *Adv. Energy Mater.*, 2019, **9**, 1803918.
9. L. Zhang, J.-S. Hu, X.-H. Huang, J. Song and S.-Y. Lu, *Nano Energy*, 2018, **48**, 489-499.
10. E. Hu, Y. Feng, J. Nai, D. Zhao, Y. Hu and X. W. Lou, *Energy & Environmental Science*, 2018, **11**, 872-880.
11. Y. Pan, K. Sun, S. Liu, X. Cao, K. Wu, W.-C. Cheong, Z. Chen, Y. Wang, Y. Li, Y. Liu, D. Wang, Q. Peng, C. Chen and Y. Li, *J. Am. Chem. Soc.*, 2018, **140**, 2610-2618.
12. G. Anandhababu, Y. Huang, D. D. Babu, M. Wu and Y. Wang, *Adv. Funct. Mater.*, 2018, **28**, 1706120.
13. C. Guan, W. Xiao, H. Wu, X. Liu, W. Zang, H. Zhang, J. Ding, Y. P. Feng, S. J. Pennycook and J. Wang, *Nano Energy*, 2018, **48**, 73-80.
14. X. Ma, Y. Chang, Z. Zhang and J. Tang, *J. Mater. Chem. A*, 2018, **6**, 2100-2106.
15. Z.-H. Xue, H. Su, Q.-Y. Yu, B. Zhang, H.-H. Wang, X.-H. Li and J.-S. Chen, *Adv. Energy Mater.*, 2017, **7**, 1602355.
16. P. He, X.-Y. Yu and X. W. Lou, *Angew. Chem. Int. Ed.*, 2017, **56**, 3897-3900.
17. X. Wang, X. Huang, W. Gao, Y. Tang, P. Jiang, K. Lan, R. Yang, B. Wang and R. Li, *Journal of Materials Chemistry A*, 2018, **6**, 3684-3691.

18. T. Ouyang, Y.-Q. Ye, C.-Y. Wu, K. Xiao and Z.-Q. Liu, *Angewandte Chemie International Edition*, 2019, **58**, 4923-4928.
19. J. Liu, Y. Ji, J. Nai, X. Niu, Y. Luo, L. Guo and S. Yang, *Energy Environ. Sci.*, 2018, **11**, 1736-1741.
20. R. Li, B. Hu, T. Yu, H. Chen, Y. Wang and S. Song, *Adv. Sci.*, 2020, **7**, 1902830.
21. Y. Wu, X. Tao, Y. Qing, H. Xu, F. Yang, S. Luo, C. Tian, M. Liu and X. Lu, *Adv. Mater.*, 2019, **31**, 1900178.
22. Y. Du, M. Zhang, Z. Wang, Y. Liu, Y. Liu, Y. Geng and L. Wang, *J. Mater. Chem. A*, 2019, **7**, 8602-8608.
23. Y. Yang, Z. Lin, S. Gao, J. Su, Z. Lun, G. Xia, J. Chen, R. Zhang and Q. Chen, *ACS Catal.*, 2017, **7**, 469-479.
